# Supplementary material for: High-pressure bandgap engineering and amorphization in TiNb2O7 single crystals
Source: Royal Society of Chemistry journal article supplement (doi:10.1039/d2ce00168c), 2022-01-01
Supplement: d2ce00168c1.pdf [file d2ce00168c1.pdf]

Electronic Supplementary Information (ESI) for

## High-pressure Bandgap Engineering and Amorphization in $\text{TiNb}_2\text{O}_7$ Single Crystals

Shufan Jia<sup>a</sup>, Qiang Zhou<sup>a</sup>, Fangfei Li<sup>a</sup>, Yuxin Hu<sup>a,b</sup>, Chenning Wang<sup>a</sup>, Xiaohan Wang<sup>a</sup>,  
Songying He<sup>a</sup>, Xinyang Li<sup>a</sup>, Liang Li<sup>a†</sup>, Tian Cui<sup>a,c</sup>

<sup>a</sup>*College of Physics, Jilin University, 130000, Changchun, P. R. China.*

<sup>b</sup>*Hangzhou Institute for Advanced Study, UCAS, 310024, Hangzhou, P. R. China.*

<sup>c</sup>*School of Physical Science and Technology, Ningbo University, 315211, Ningbo, P. R. China.*

†Corresponding author.

Email: [liliang@jlu.edu.cn](mailto:liliang@jlu.edu.cn)

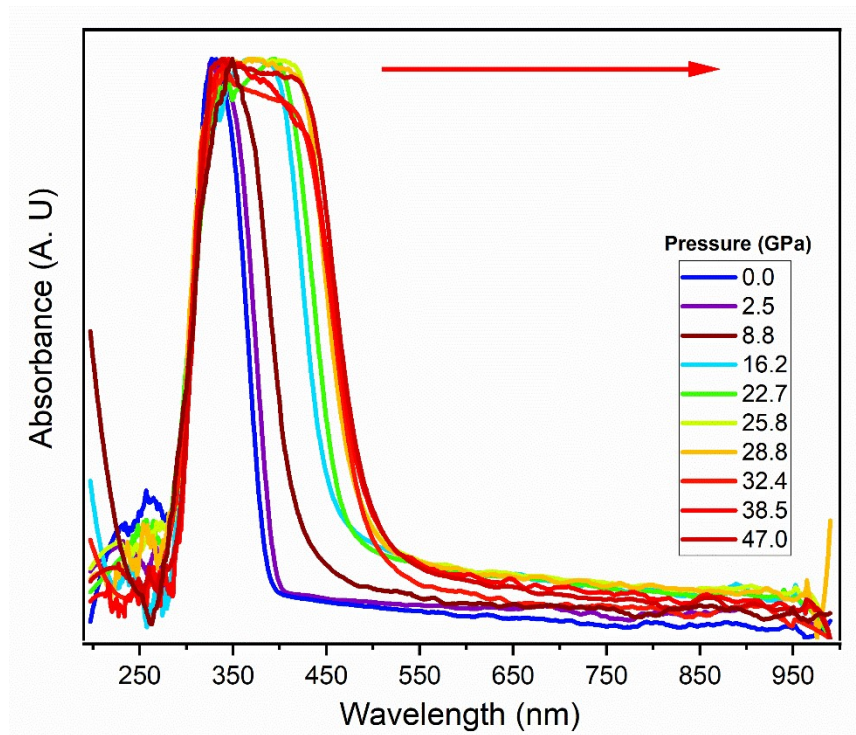

Figure S1. The absorption spectra of  $\text{TiNb}_2\text{O}_6$  single crystal at various pressure from 190 nm to 1000 nm.

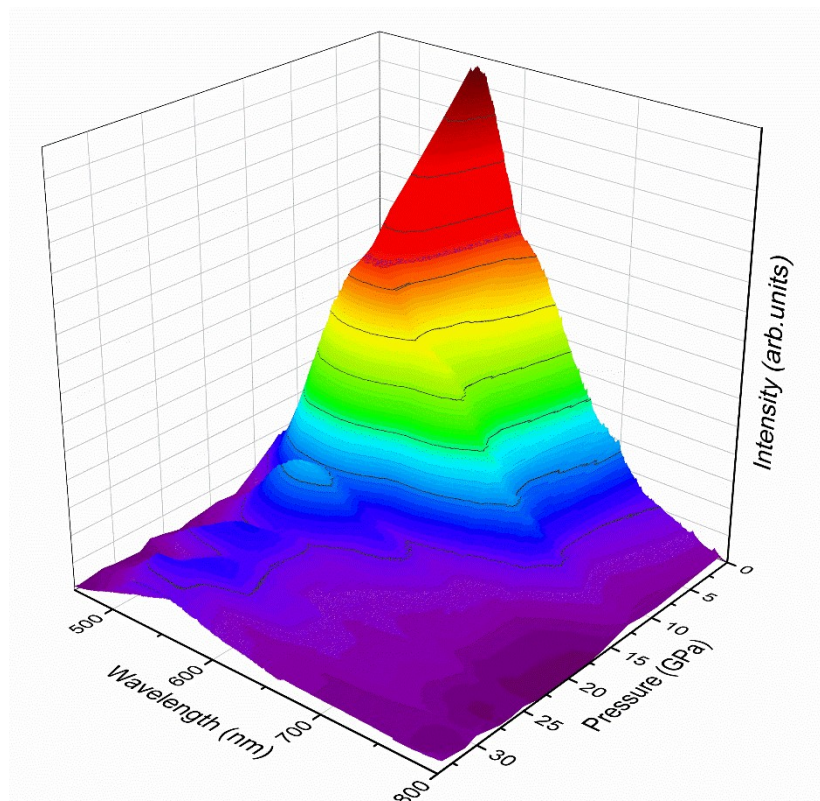

Figure S2. The photoluminescence spectra of  $\text{TiNb}_2\text{O}_6$  single crystal at various pressure excited by 325 nm laser. The intensity of photoluminescence decreased with increasing pressure without the changing in central wavelength.

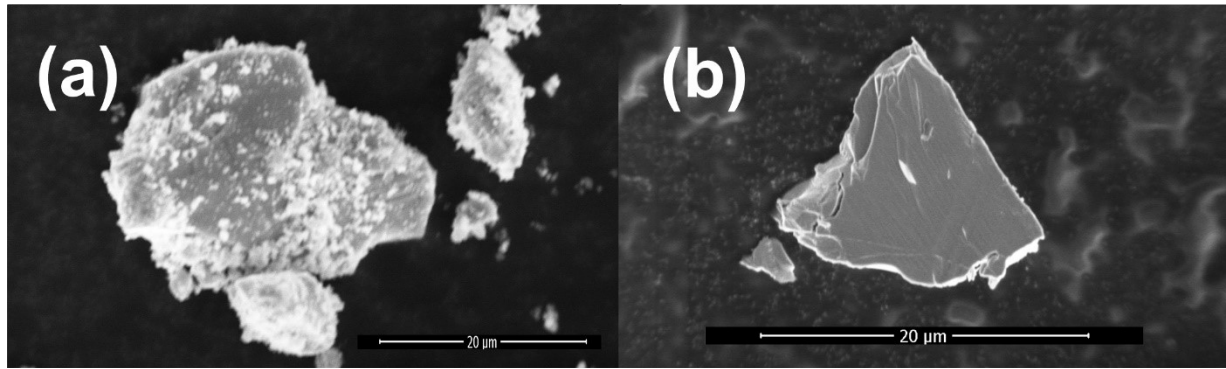

Figure S3. (a) The Scanning electron microscope (SEM) image of  $\text{TiNb}_2\text{O}_6$  single crystal powder before compression. (b) The SEM image of  $\text{TiNb}_2\text{O}_6$  single crystal after compression.
